# Supplementary material
Source: publisher figshare collection journal article supplement (https://acs.figshare.com/ndownloader/files/11601761)
Supplement: Supplementary file 1 [file 11601761]

## **Supporting Information**

### **Synergistically Enhanced Antimetastasis Effects by Honokiol-Loaded pH-Sensitive Polymer-Doxorubicin Conjugate Micelles**

Yang Zou, Yuanhang Zhou, Yao Jin, Chuyu He, Yunqiang Deng, Shidi Han, Chuhang Zhou, Xinru Li, Yanxia Zhou, and Yan Liu \*

*Beijing Key Laboratory of Molecular Pharmaceutics and New Drug Delivery Systems,  
School of Pharmaceutical Sciences, Peking University, Beijing 100191, China*

\*Corresponding author. E-mail: yanliu@bjmu.edu.cn

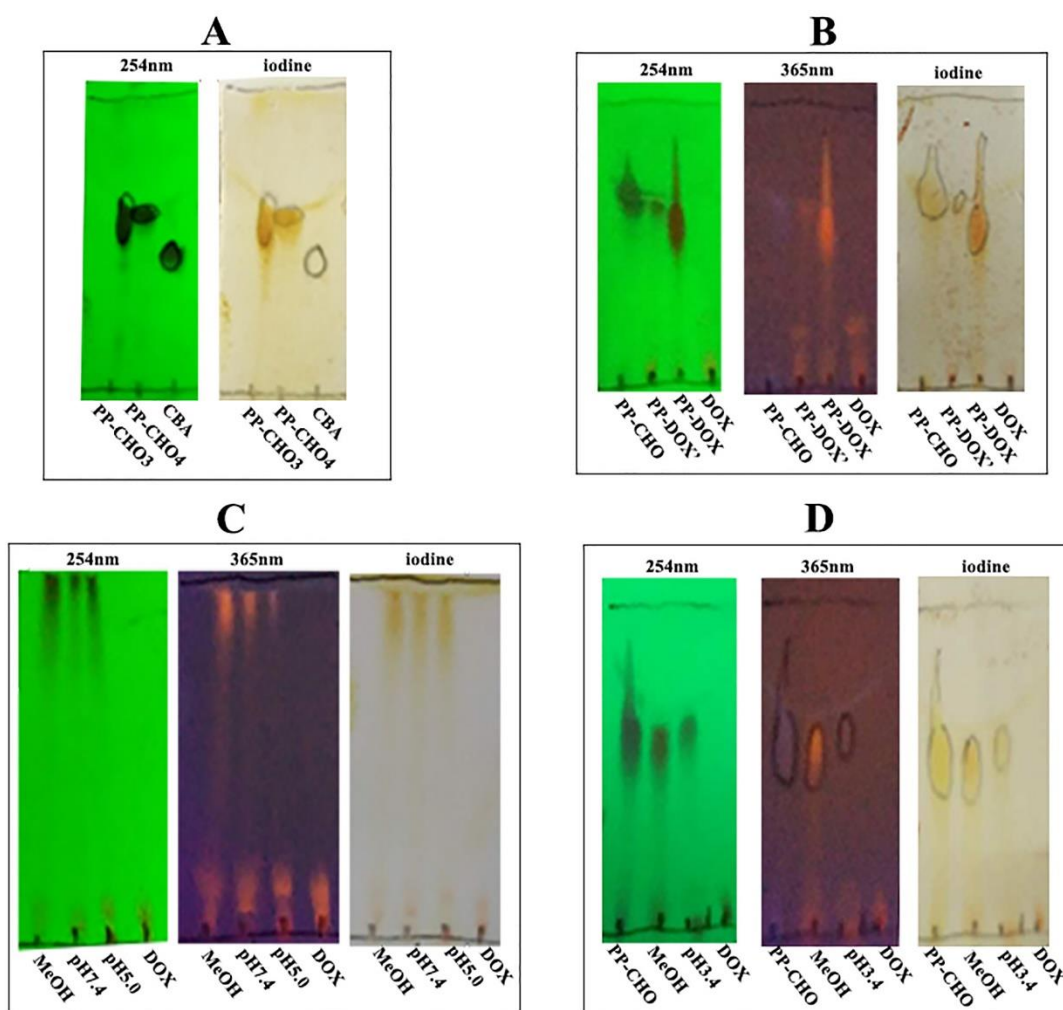

**Figure S1.** (A) Thin layer chromatograms (TLC) of PEOz-PLA-CHO purified in ether for three (PP-CHO3) and four (PP-CHO4) times and 4-Carboxybenzaldehyde (CBA). (B) TLC of PEOz-PLA-CHO (PP-CHO), PEOz-PLA-imi-DOX before (PP-DOX') and after (PP-DOX) applied to Sephadex LH-20 column, and DOX. PEOz-PLA-CHO and PEOz-PLA-imi-DOX were developed to be yellow spots by iodine. PEOz-PLA-CHO and CBA showed fluorescence quenching under 254 nm UV lamp, PEOz-PLA-imi-DOX and DOX showed fluorescence under 365 nm UV lamp. TLC of PEOz-PLA-imi-DOX following hydrolysis for 24 h at pH 5.0 and pH 7.4 (C), and 5 min at pH 3.4 (D). PEOz-PLA-imi-DOX was dissolved in methanol (MeOH) and buffer solution with different pH (ABS with pH 3.4 and 5.0, and PBS with pH 7.4).

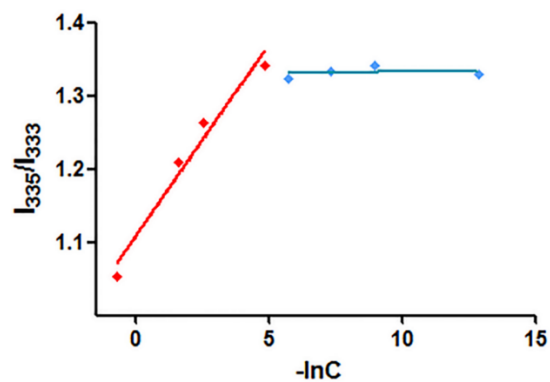

**Figure S2.** Plot of the ratio of fluorescence intensity at 335 nm to that at 333 from pyrene as a function of  $\ln(1/C)$  for PEOz-PLA-imi-DOX in distilled water.

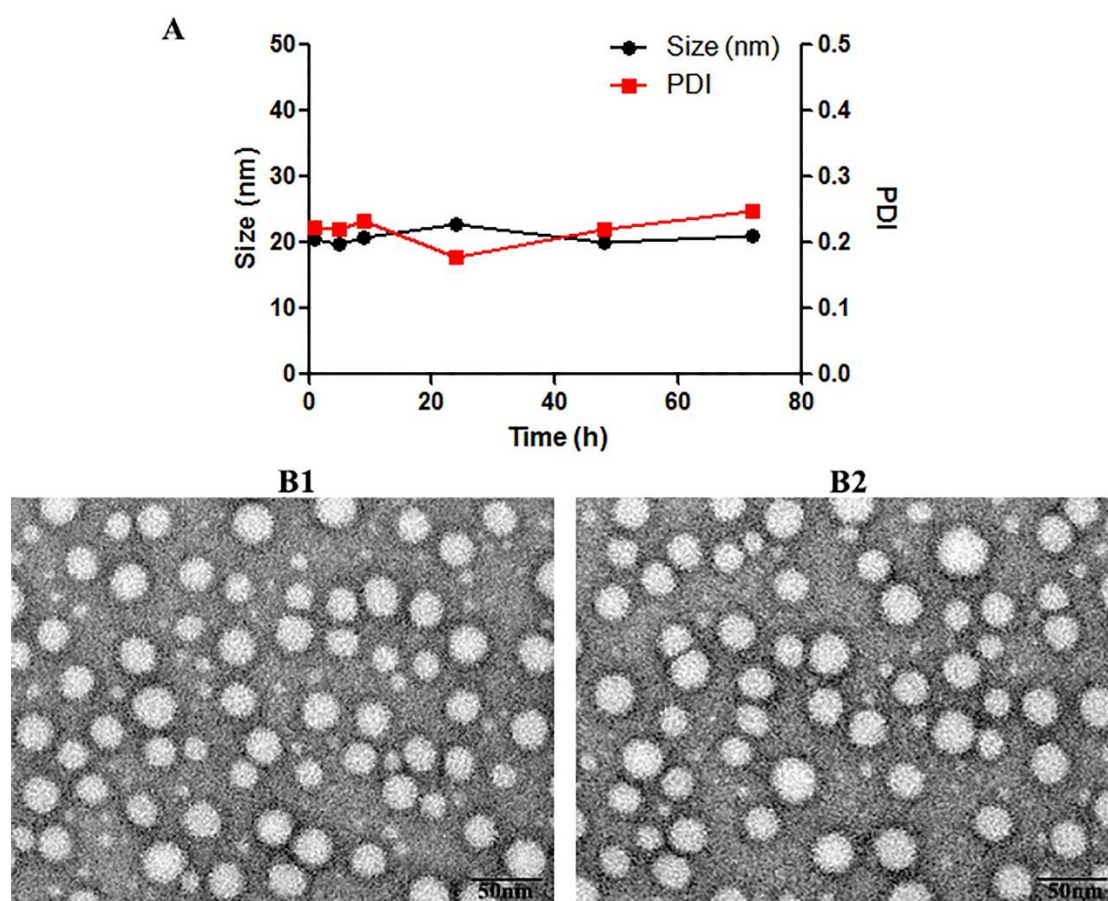

**Figure S3.** Changes in particle size and its distribution (A) and morphology (B) of HNK5/PP-DOX1-PM in PBS (pH 7.4) with time at 37°C. TEM images were obtained at 0 h (B1) and 72 h (B2).

**Table S1.** The Blood Routine Index of BABL/C Nude Mice Injected MDA-MB-231-Luc-GFP Cells After Treatment with Various Micellar Formulations.

| Blood routine index       | Saline          | HNK5+DOX1/PP-PM                | HNK5/PP-DOX1-PM             |
|---------------------------|-----------------|--------------------------------|-----------------------------|
| GR (10 <sup>9</sup> /L)   | 2.98 ± 0.93     | 3.36 ± 1.29                    | 2.51 ± 1.53                 |
| GR% (%)                   | 36.25 ± 11.32   | 54.74 ± 16.29                  | 52.33 ± 10.24               |
| HCT (%)                   | 47.68 ± 1.20    | 40.40 ± 2.72                   | 37.43 ± 5.68                |
| HGB (g/L)                 | 150.50 ± 5.24   | 125.20 ± 8.37                  | 121.16 ± 18.40              |
| LY (10 <sup>9</sup> /L)   | 4.78 ± 1.41     | 2.46 ± 1.04                    | 1.78 ± 0.51                 |
| LY% (%)                   | 57.48 ± 10.67   | 40.68 ± 15.46                  | 42.26 ± 10.51               |
| MCH (pg)                  | 15.15 ± 0.54    | 14.48 ± 0.60                   | 14.51 ± 0.54                |
| MCHC (g/L)                | 315.50 ± 8.02   | 309.80 ± 9.62                  | 323.83 ± 9.98               |
| MCV (fL)                  | 47.98 ± 2.08    | 46.66 ± 1.62                   | 44.93 ± 1.45                |
| MO (10 <sup>9</sup> /L)   | 0.51 ± 0.12     | 0.28 ± 0.08                    | 0.23 ± 0.12                 |
| MO% (%)                   | 6.27 ± 1.09     | 4.58 ± 1.31                    | 5.40 ± 2.09                 |
| MPV (fL)                  | 5.68 ± 1.05     | 4.94 ± 0.11                    | 5.30 ± 0.11                 |
| PCT (%)                   | 0.19 ± 0.09     | 0.26 ± 0.05                    | 0.21 ± 0.05                 |
| PDW (fL)                  | 13.62 ± 0.94    | 13.24 ± 0.29                   | 13.86 ± 0.58                |
| PLT (10 <sup>9</sup> /L)  | 371.83 ± 173.28 | 526.80 ± 100.77 <sup>a,c</sup> | 399.50 ± 95.27 <sup>b</sup> |
| RBC (10 <sup>12</sup> /L) | 9.95 ± 0.60     | 8.64 ± 0.74                    | 8.32 ± 1.22                 |
| RDW (%)                   | 13.40 ± 1.13    | 13.08 ± 0.76                   | 12.50 ± 0.23                |
| WBC (10 <sup>9</sup> /L)  | 8.28 ± 1.38     | 6.10 ± 0.94                    | 4.53 ± 2.06                 |

<sup>a</sup>  $p < 0.001$ , <sup>b</sup>  $p > 0.05$ , vs saline;

<sup>c</sup>  $p < 0.001$ , vs HNK5/PP-DOX1-PM.
